# Supplementary material for: The implementation and effectiveness of the one stop centre model for intimate partner and sexual violence in low- and middle-income countries: a systematic review of barriers and enablers
Source: PubMed Central journal article supplement — BMJ Glob Health. 2020 Mar 30;5(3):e001883. doi: 10.1136/bmjgh-2019-001883 (PMC7170420; doi:10.1136/bmjgh-2019-001883), 2020-03-30
Supplement: bmjgh-2019-001883supp002.pdf [file bmjgh-2019-001883supp002.pdf]

**S2 Table. CINAHL search strategy.**

9 January 2019

Developed by Rose Olson

Evaluation of one stop crisis centers for intimate partner or sexual violence systematic review

| #      | Searches                                                                                                                                                                                                                                                                                                                                                                                                                                                                                                                                                                                                                                                                                                                                                                                                                                                                                                                                                                                                                                                                                                                                                                                                                                                               | Results |
|--------|------------------------------------------------------------------------------------------------------------------------------------------------------------------------------------------------------------------------------------------------------------------------------------------------------------------------------------------------------------------------------------------------------------------------------------------------------------------------------------------------------------------------------------------------------------------------------------------------------------------------------------------------------------------------------------------------------------------------------------------------------------------------------------------------------------------------------------------------------------------------------------------------------------------------------------------------------------------------------------------------------------------------------------------------------------------------------------------------------------------------------------------------------------------------------------------------------------------------------------------------------------------------|---------|
| S<br>1 | (MH "Intimate Partner Violence+") OR (MH "Domestic Violence+") OR (MH "Battered Women+") OR (MH "Sexual Abuse") OR (MH "Rape") OR TI "intimate partner violence" OR TI "domestic violence" OR TI "dating violence" OR TI "partner violence" OR TI "partner assault" OR TI "family violence" OR TI "domestic abuse" OR TI "domestic assault" OR TI "partner abuse" OR TI "wife abuse" OR TI "gender based violence" OR TI "gender violence" OR TI "spousal abuse" OR TI "spousal violence" OR TI "wife beating" OR TI "intimate terrorism" OR TI "sexual violen*" OR TI "sexual abuse*" OR TI "sex abuse*" OR TI "sexual assault*" OR TI "battered women" OR TI "rape" OR TI "rapist" OR TI "raped" OR AB "intimate partner violence" OR AB "domestic violence" OR AB "dating violence" OR AB "partner violence" OR AB "partner assault" OR AB "family violence" OR AB "domestic abuse" OR AB "domestic assault" OR AB "partner abuse" OR AB "wife abuse" OR AB "gender based violence" OR AB "gender violence" OR AB "spousal abuse" OR AB "spousal violence" OR AB "wife beating" OR AB "intimate terrorism" OR AB "sexual violen*" OR AB "sexual abuse*" OR AB "sex abuse*" OR AB "sexual assault*" OR AB "battered women" OR AB "rape" OR AB "rapist" OR AB "raped" | 44246   |
| S<br>2 | TI "violent" OR TI "violence" OR TI "violate*" OR TI "abuse" OR TI "abuser" OR TI "abused" OR TI "abusers" OR TI "abuses" OR TI "mistreat*" OR TI "coerce" OR TI "coerced" OR TI "coercing" OR TI "coercion" OR TI "coercive" OR TI "assault*" OR TI "offense*" OR AB "violent" OR AB "violence" OR AB "violate*" OR AB "abuse" OR AB "abuser" OR AB "abused" OR AB "abusers" OR AB "abuses" OR AB "mistreat*" OR AB "coerce" OR AB "coerced" OR AB "coercing" OR AB "coercion" OR AB "coercive" OR AB "assault*" OR AB "offense"                                                                                                                                                                                                                                                                                                                                                                                                                                                                                                                                                                                                                                                                                                                                      | 74996   |
| S<br>3 | TI "spouse" OR TI "spouses" OR TI "marriage" OR TI "partner" OR TI "partners" OR TI "husband" OR TI "husbands" OR TI "wife" OR TI "wives" OR TI "sexual" OR TI "sexually" AB "spouse" OR AB "spouses" OR AB "marriage" OR AB "partner" OR AB "partners" OR AB "husband" OR AB "husbands" OR AB "wife" OR AB "wives" OR AB "sexual" OR AB "sexually"                                                                                                                                                                                                                                                                                                                                                                                                                                                                                                                                                                                                                                                                                                                                                                                                                                                                                                                    | 88361   |
| S<br>4 | (S1 OR (S2 AND S3))                                                                                                                                                                                                                                                                                                                                                                                                                                                                                                                                                                                                                                                                                                                                                                                                                                                                                                                                                                                                                                                                                                                                                                                                                                                    | 46963   |
| S<br>5 | TI "centre" OR TI "center" OR TI "centres" OR TI "centers" OR TI "one stop" OR TI "standalone" OR TI "stand alone" OR TI "coordinated care" OR TI "comprehensive care" OR TI "protection unit" OR TI "casa de la mujer" OR TI "casa de mujer" OR TI "ciudad mujer" OR TI "thuthuzela" OR AB "centre" OR AB "center" OR AB "centres" OR AB "centers" OR AB "one stop" OR AB "standalone" OR AB                                                                                                                                                                                                                                                                                                                                                                                                                                                                                                                                                                                                                                                                                                                                                                                                                                                                          | 40225   |

|        |                                                                                                                                                                                  |     |
|--------|----------------------------------------------------------------------------------------------------------------------------------------------------------------------------------|-----|
|        | "stand alone" OR AB "coordinated care" OR AB "comprehensive care" OR AB "protection unit" OR AB "casa de la mujer" OR AB "casa de mujer" OR AB "ciudad mujer" OR AB "thuthuzela" |     |
| S<br>6 | (S4 AND S5)                                                                                                                                                                      | 304 |
| S<br>7 | (S4 AND S5) – exclude MEDLINE records                                                                                                                                            | 137 |
