# Supplementary material for: The implementation and effectiveness of the one stop centre model for intimate partner and sexual violence in low- and middle-income countries: a systematic review of barriers and enablers
Source: PubMed Central journal article supplement — BMJ Glob Health. 2020 Mar 30;5(3):e001883. doi: 10.1136/bmjgh-2019-001883 (PMC7170420; doi:10.1136/bmjgh-2019-001883), 2020-03-30
Supplement: bmjgh-2019-001883supp004.pdf [file bmjgh-2019-001883supp004.pdf]

| <b>OSCC REVIEW - DATA EXTRACTION</b>                                                                                                                                                                                                                                                                    |  |
|---------------------------------------------------------------------------------------------------------------------------------------------------------------------------------------------------------------------------------------------------------------------------------------------------------|--|
| Reviewer                                                                                                                                                                                                                                                                                                |  |
| Date                                                                                                                                                                                                                                                                                                    |  |
| Notes:                                                                                                                                                                                                                                                                                                  |  |
| <b>1. IDENTIFICATION</b>                                                                                                                                                                                                                                                                                |  |
| RefID                                                                                                                                                                                                                                                                                                   |  |
| Authors                                                                                                                                                                                                                                                                                                 |  |
| Title                                                                                                                                                                                                                                                                                                   |  |
| <b>2. ELIGIBILITY</b>                                                                                                                                                                                                                                                                                   |  |
| Is the study eligible for inclusion?                                                                                                                                                                                                                                                                    |  |
| Reason for exclusion                                                                                                                                                                                                                                                                                    |  |
| <b>3. SETTING, DEMOGRAPHICS, AND PARTICIPANTS</b>                                                                                                                                                                                                                                                       |  |
| Location of study (city, district, state, country)                                                                                                                                                                                                                                                      |  |
| Name of OSCC                                                                                                                                                                                                                                                                                            |  |
| Responsible agency (NGO-based, governmental- based, combined)                                                                                                                                                                                                                                           |  |
| Setting location (acute care hospital, emergency setting, general practice clinic, community)                                                                                                                                                                                                           |  |
| Language                                                                                                                                                                                                                                                                                                |  |
| Participant characteristics (victims/survivors of intimate partner violence, sexual violence, child abuse, etc).                                                                                                                                                                                        |  |
| # of participants (total; specify how many per FGD/how many interviewed)                                                                                                                                                                                                                                |  |
| Participant sex                                                                                                                                                                                                                                                                                         |  |
| Participant age                                                                                                                                                                                                                                                                                         |  |
| Perspective (user, provider, programme manager, policy maker, multiple)                                                                                                                                                                                                                                 |  |
| <b>4. INTERVENTIONS</b>                                                                                                                                                                                                                                                                                 |  |
| Medical services provided? (yes/no); Describe details: who provided care (doctors, nurses, etc), location of clinical services (on site or referral), services provided (general services, forensic exam and specimen collection, HIV and STI screening and prophylaxis, emergency contraception, etc.) |  |
| Psychosocial support provided? (yes/no); Describe (emergency and/or long-term support/counselling, availability of specialized psychiatric services )                                                                                                                                                   |  |

|                                                                                                                     |  |
|---------------------------------------------------------------------------------------------------------------------|--|
| Legal support? (yes/no); Describe (on or off site, description of legal and advocacy services available)            |  |
| Police and reporting assistance services?                                                                           |  |
| Social worker? (yes/no); Describe (on or off site, services provided)                                               |  |
| Shelter? (yes/no); Describe:                                                                                        |  |
| Other? (yes/no); Describe:                                                                                          |  |
| <b>5. STUDY DESIGN &amp; DATA COLLECTION</b>                                                                        |  |
| Aims or objectives                                                                                                  |  |
| Study design (randomized, cluster, cross-over)                                                                      |  |
| Study duration                                                                                                      |  |
| How was the sample formed? Recruitment strategy?                                                                    |  |
| Concerns about bias (indicate if own concerns or author's concerns)                                                 |  |
| How many sites included in the study?                                                                               |  |
| What data collection method was used? (i.e.: focus group, in-depth interview, survey)                               |  |
| Description of data collection                                                                                      |  |
| Impression of methodologic limitations (minor, moderate, significant)                                               |  |
| <b>6. ETHICS</b>                                                                                                    |  |
| How were ethical issues addressed?                                                                                  |  |
| <b>7. DATA ANALYSIS</b>                                                                                             |  |
| What data analysis method was used (i.e.: grounded theory, thematic analysis, description of quantitative analysis) |  |



|                                                                                                                                                   |  |                                       |
|---------------------------------------------------------------------------------------------------------------------------------------------------|--|---------------------------------------|
|                                                                                                                                                   |  |                                       |
|                                                                                                                                                   |  |                                       |
| <b>If there is no quantitative component, skip to section 9.</b>                                                                                  |  |                                       |
| <b>9. QUANTITATIVE DATA EXTRACTION (note: the quantitative studies have a broad range on outcomes collected/report unsure of how to extract )</b> |  |                                       |
| Data source                                                                                                                                       |  | If other or multiple - specify source |
| Comments on study design                                                                                                                          |  |                                       |
| 1-Describe in words the <b>first</b> OSCC outcome measure                                                                                         |  |                                       |
| 1-What outcome measurement is used (i.e.: percentage, prevalence, OR)                                                                             |  |                                       |
| 1-Describe # of cases, denominator, percentages and any other relevant outcome measures IN DETAIL                                                 |  |                                       |
| 2-Describe in words the <b>second</b> OSCC outcome measure                                                                                        |  |                                       |
| 2-What outcome measurement is used (i.e.: percentage, prevalence, OR)                                                                             |  |                                       |
| 2-Describe # of cases, denominator, percentages and any other relevant outcome measures IN DETAIL                                                 |  |                                       |
| 3-Describe in words the <b>third</b> OSCC outcome measure                                                                                         |  |                                       |
| 3-What outcome measurement is used (i.e.: percentage, prevalence, OR)                                                                             |  |                                       |
| 3-Describe # of cases, denominator, percentages and any other relevant outcome measures IN DETAIL                                                 |  |                                       |
| 4-Describe in words the <b>fourth</b> OSCC outcome measure                                                                                        |  |                                       |
| 4-What outcome measurement is used (i.e.: percentage, prevalence, OR)                                                                             |  |                                       |
| 4-Describe # of cases, denominator, percentages and any other relevant outcome measures IN DETAIL                                                 |  |                                       |
| 5-Describe in words the <b>fifth</b> OSCC outcome measure                                                                                         |  |                                       |
| 5-What outcome measurement is used (i.e.: percentage, prevalence, OR)                                                                             |  |                                       |

|                                                                                                   |  |
|---------------------------------------------------------------------------------------------------|--|
| 5-Describe # of cases, denominator, percentages and any other relevant outcome measures IN DETAIL |  |
| <b>10. CONCLUSIONS</b>                                                                            |  |
| What are the author's main conclusions?                                                           |  |
| <b>11. COMMENTS</b>                                                                               |  |
| Reviewer comments                                                                                 |  |
