# Supplementary material for: The implementation and effectiveness of the one stop centre model for intimate partner and sexual violence in low- and middle-income countries: a systematic review of barriers and enablers
Source: PubMed Central journal article supplement — BMJ Glob Health. 2020 Mar 30;5(3):e001883. doi: 10.1136/bmjgh-2019-001883 (PMC7170420; doi:10.1136/bmjgh-2019-001883), 2020-03-30
Supplement: bmjgh-2019-001883supp007.pdf [file bmjgh-2019-001883supp007.pdf]

|    | Article Title                                                                                                            | Was there a clear statement of the aims of the research? | is a qualitative methodology appropriate? | Is it worth to continuing? | Was the research design appropriate to address the aims of the research? | Was the recruitment strategy appropriate to the aims of the research? | Was the data collected in a way that addressed the research issue? | Has the relationship between researcher and participants been adequately considered? | Have ethical issues been taken into consideration? | Was the data analysis sufficiently rigorous? | Is there a clear statement of findings? | How valuable is the research? | TOTAL | Interpretation |
|----|--------------------------------------------------------------------------------------------------------------------------|----------------------------------------------------------|-------------------------------------------|----------------------------|--------------------------------------------------------------------------|-----------------------------------------------------------------------|--------------------------------------------------------------------|--------------------------------------------------------------------------------------|----------------------------------------------------|----------------------------------------------|-----------------------------------------|-------------------------------|-------|----------------|
|    |                                                                                                                          | Score                                                    | Score                                     | Yes/No                     | Score                                                                    | Score                                                                 | Score                                                              | Score                                                                                | Score                                              | Score                                        | Score                                   | Score                         | Score |                |
| 15 | One stop crisis centres: A policy analysis of the Malaysian response to intimate partner violence                        | 2                                                        | 2                                         | YES                        | 2                                                                        | 1                                                                     | 2                                                                  | 2                                                                                    | 2                                                  | 2                                            | 2                                       | 2                             | 19    | minor/none     |
| 16 | An integrated health sector response to violence against women in Malaysia: lessons for supporting scale up              | 2                                                        | 2                                         | YES                        | 2                                                                        | 1                                                                     | 2                                                                  | 2                                                                                    | 2                                                  | 2                                            | 2                                       | 2                             | 19    | minor/none     |
| 57 | Conflict, crisis, and abuse in Dharavi, Mumbai: experiences from six years at a centre for vulnerable women and children | 1                                                        | 2                                         | YES                        | 1                                                                        | 0                                                                     | 0                                                                  | 2                                                                                    | 2                                                  | 0                                            | 1                                       | 1                             | 10    | significant    |
| 10 | Establishing a one-stop crisis center for women suffering violence in Khonkaen hospital, Thailand                        | 2                                                        | 2                                         | YES                        | 2                                                                        | 0                                                                     | 2                                                                  | 1                                                                                    | 0                                                  | 0                                            | 1                                       | 1                             | 11    | significant    |
| 48 | Delivering post-rape care services: Kenya's experience                                                                   | 2                                                        | 2                                         | YES                        | 2                                                                        | 0                                                                     | 0                                                                  |                                                                                      |                                                    | 1                                            | 1                                       | 1                             | 9     | significant    |

|    |                                                                                                                                                        |   |   |     |   |   |   |   |   |   |   |   |    |             |  |
|----|--------------------------------------------------------------------------------------------------------------------------------------------------------|---|---|-----|---|---|---|---|---|---|---|---|----|-------------|--|
|    | in developing integrated services                                                                                                                      |   |   |     |   |   |   |   |   |   |   |   |    |             |  |
| 40 | Comprehensive care and HIV prophylaxis after sexual assault in rural South Africa: the Refentse intervention study                                     | 2 | 2 | YES | 1 | 0 | 2 | 2 | 2 | 1 | 2 | 1 | 15 | moderate    |  |
| 17 | A Holistic, Person-Centred Care Model for Victims of Sexual Violence in Democratic Republic of Congo: The Panzi Hospital One-Stop Centre Model of Care | 2 | 2 | YES |   | 2 | 0 | 2 | 0 | 0 | 2 | 1 | 11 | significant |  |
| 14 | Comprehensive responses to gender based violence in low-resource settings: Lessons learned from implementation.                                        | 2 | 2 | YES |   | 0 | 2 | 0 | 0 | 0 | 2 | 1 | 9  | significant |  |
| 39 | Violence against Women in Melanesia and Timor-Leste                                                                                                    | 2 | 2 | YES | 2 | 1 | 2 | 2 | 2 | 0 | 2 | 2 | 17 | moder/minor |  |
| 49 | Challenges and gaps in addressing domestic violence in Health Policy of Bangladesh                                                                     | 2 | 2 | YES | 2 | 1 | 1 | 2 | 2 | 1 | 2 | 1 | 16 | moderate    |  |
| 34 | One stop crisis centre : A model of hospital-based service for domestic violence, burn & sexual assault survivors in Bangladesh                        | 1 | 1 | YES | 1 | 0 | 1 | 0 | 0 | 0 | 1 | 1 | 6  | significant |  |

|           |                                                                                                                                 |   |   |     |   |   |   |   |   |   |   |   |    |                      |
|-----------|---------------------------------------------------------------------------------------------------------------------------------|---|---|-----|---|---|---|---|---|---|---|---|----|----------------------|
| <b>51</b> | "I feel it is not enough. . ." Health providers' perspectives on services for victims of intimate partner violence in Malaysia  | 2 | 2 | YES | 2 | 1 | 2 | 2 | 2 | 2 | 2 | 2 | 19 | minor/none           |
| <b>56</b> | Community perceptions on domestic violence against pregnant women in Nepal: a qualitative study                                 | 2 | 2 | YES | 2 | 1 | 2 | 2 | 2 | 2 | 2 | 2 | 19 | minor/none           |
| <b>12</b> | A Review and Evaluation of Multi-Sectoral Response Services ("One-Stop Centers") for Gender-Based Violence in Kenya and Zambia. | 2 | 2 | YES | 1 | 1 | 1 | 2 | 2 | 2 | 2 | 2 | 17 | minor/moderate       |
| <b>11</b> | Health sector response to gender-based violence: an assessment of Asia Pacific Region                                           | 2 | 2 | YES | 2 | 1 | 1 | 1 | 0 | 1 | 2 | 2 | 14 | moderate/significant |
| <b>54</b> | Independent country program evaluation: Bangladesh                                                                              | 2 | 2 | YES | 2 | 1 | 2 | 0 | 1 | 0 | 2 | 2 | 14 | moderate/significant |
| <b>52</b> | Final evaluation of Rwandan Government and ONE UN Isange One-Stop Centre                                                        | 2 | 2 | YES | 2 | 1 | 2 | 1 | 2 | 2 | 2 | 2 | 18 | minor                |
| <b>41</b> | One-Stop Model of Support for Survivors of Gender-Based Violence: Lessons from Care Zambia                                      | 2 | 2 | YES | 1 | 0 | 0 | 0 | 0 | 0 | 1 | 1 | 7  | significant          |
| <b>38</b> | Assessment of the Performance of the Hospital-Based One Stop Crisis                                                             | 2 | 2 | YES | 2 | 1 | 2 | 1 | 2 | 1 | 2 | 1 | 16 | moderate             |

|    |                                                                                                    |   |   |     |   |   |   |   |   |   |   |   |    |                |  |
|----|----------------------------------------------------------------------------------------------------|---|---|-----|---|---|---|---|---|---|---|---|----|----------------|--|
|    | Management Centres                                                                                 |   |   |     |   |   |   |   |   |   |   |   |    |                |  |
| 13 | Thuthuzela care centres compliance audit and gap analysis 2016                                     | 2 | 2 | YES | 2 | 1 | 2 | 1 | 2 | 2 | 2 | 2 | 18 | minor          |  |
| 1  | Evaluación de Impacto del Proyecto Ciudad Mujer en El Salvador                                     | 2 | 2 | YES | 2 | 2 | 2 | 1 | 1 | 2 | 2 | 2 | 18 | minor          |  |
| 59 | Post rape services in kenya: A situational analysis                                                | 2 | 2 | YES | 2 | 1 | 2 | 1 | 2 | 2 | 2 | 2 | 18 | minor          |  |
| 53 | USAID/Zambia Gender-Based Violence Programming Evaluation                                          | 2 | 2 | YES | 2 | 0 | 2 | 0 | 2 | 1 | 2 | 2 | 15 | moderate       |  |
| 45 | Violence against women and girls: Lessons from south asia                                          | 2 | 2 | YES | 0 | 0 | 0 | 1 | 1 | 0 | 2 | 1 | 9  | significant    |  |
| 47 | Evaluation Report on Project SHAHEED BENZAIK BHUTTO WOMEN CENTERS TRANSFERRED TO GOV OF PUNJAB     | 2 | 2 | YES | 2 | 2 | 2 | 1 | 1 | 1 | 2 | 2 | 17 | minor/moderate |  |
| 46 | Everyone blames me: Barriers to Justice and Support Services for Sexual Assault Survivors in India | 2 | 2 | YES | 2 | 1 | 2 | 2 | 2 | 1 | 2 | 2 | 18 | minor/moderate |  |
| 44 | Establishment of one-stop centres to counteract violence against women in pretoria and vryburg     | 2 | 2 | YES | 2 | 1 | 2 | 1 | 0 | 1 | 1 | 1 | 13 | moderate       |  |

|    |                                                                                                             |   |   |     |   |   |   |   |   |   |   |   |    |                      |
|----|-------------------------------------------------------------------------------------------------------------|---|---|-----|---|---|---|---|---|---|---|---|----|----------------------|
| 37 | Assessment of the Capacity of the Health Sector to Respond to Violence against Women and Children in Malawi | 2 | 2 | YES | 2 | 1 | 2 | 1 | 2 | 2 | 2 | 2 | 18 | minor                |
| 55 | Routine screening for IPV in public care settings in Kenya – an assessment of acceptability                 | 2 | 2 | YES | 2 | 1 | 2 | 1 | 2 | 1 | 2 | 2 | 17 | minor                |
| 42 | Addressing Domestic Violence within Healthcare Settings: the dilaasa model                                  | 1 | 2 | YES | 1 | 0 | 2 | 2 | 0 | 0 | 2 | 2 | 12 | moderate/significant |
| 35 | Navigating justice- An exploratory study of obstacles facing survivors of sexual violence in Sierra Leone   | 2 | 2 | YES | 2 | 2 | 2 | 1 | 2 | 0 | 2 | 1 | 16 | moderate             |
| 43 | “It sucks/It’s a wonderful service”- Post-rape care and the micro-politics of institutions.                 | 2 | 2 | YES | 1 | 0 | 2 | 2 | 2 | 1 | 2 | 2 | 16 | moderate             |
| 50 | The Dilaasa crisis centre for women: Counselling impact study                                               | 2 | 2 | YES | 2 | 2 | 2 | 0 | 2 | 2 | 2 | 2 | 18 | minor                |
| 36 | One Stop Service Centers for Victims of Violence in Mongolia                                                | 2 | 2 | YES | 1 | 0 | 1 | 0 | 2 | 2 | 2 | 1 | 13 | major                |
