# Supplementary material for: The implementation and effectiveness of the one stop centre model for intimate partner and sexual violence in low- and middle-income countries: a systematic review of barriers and enablers
Source: PubMed Central journal article supplement — BMJ Glob Health. 2020 Mar 30;5(3):e001883. doi: 10.1136/bmjgh-2019-001883 (PMC7170420; doi:10.1136/bmjgh-2019-001883), 2020-03-30
Supplement: bmjgh-2019-001883supp008.pdf [file bmjgh-2019-001883supp008.pdf]

| STROBE Checklist     | Number | Recommendation                                                                                                                                                                             | Reference # |      |      |      |      |      |      |      |
|----------------------|--------|--------------------------------------------------------------------------------------------------------------------------------------------------------------------------------------------|-------------|------|------|------|------|------|------|------|
|                      |        |                                                                                                                                                                                            | [26]        | [27] | [28] | [29] | [30] | [31] | [32] | [33] |
| Title and abstract   | 1      | (a) Indicate the study's design with a commonly used term in the title or the abstract                                                                                                     | yes         | Yes  | Yes  | Yes  | Yes  | No   | Yes  | Yes  |
|                      |        | (b) Provide in the abstract an informative and balanced summary of what was done and what was found                                                                                        | yes         | Yes  | yes  | Yes  | Yes  | No   | yes  | Yes  |
| <b>Introduction</b>  |        |                                                                                                                                                                                            |             |      |      |      |      |      |      |      |
| Background/rationale | 2      | Explain the scientific background and rationale for the investigation being reported                                                                                                       | yes         | Yes  | Yes  | yes  | Yes  | Yes  | yes  | Yes  |
| Objectives           | 3      | State specific objectives, including any prespecified hypotheses                                                                                                                           | yes         | Yes  | Yes  | yes  | Yes  | Yes  | yes  | no   |
| <b>Methods</b>       |        |                                                                                                                                                                                            |             |      |      |      |      |      |      |      |
| Study design         | 4      | Present key elements of study design early in the paper                                                                                                                                    | yes         | Yes  | Yes  | Yes  | Yes  | Yes  | yes  | yes  |
| Setting              | 5      | Describe the setting, locations, and relevant dates, including periods of recruitment, exposure, follow-up, and data collection                                                            | yes         | Yes  | Yes  | Yes  | Yes  | Yes  | yes  | yes  |
| Participants         | 6      | (a) <i>Cohort study</i> —Give the eligibility criteria, and the sources and methods of selection of participants. Describe methods of follow-up                                            |             |      |      |      |      |      |      |      |
|                      |        | <i>Case-control study</i> —Give the eligibility criteria, and the sources and methods of case ascertainment and control selection. Give the rationale for the choice of cases and controls |             |      |      |      |      |      |      |      |
|                      |        | <i>Cross-sectional study</i> —Give the eligibility criteria, and the sources and methods of selection of participants                                                                      | yes         | Yes  | Yes  | Yes  | Yes  | yes  | yes  | no   |
|                      |        | (b) <i>Cohort study</i> —For matched studies, give matching criteria and number of exposed and unexposed                                                                                   |             |      |      |      |      |      |      |      |

*Case-control study*—For matched studies, give matching criteria and the number of controls per case

|                              |    |                                                                                                                                                                                      |     |     |     |     |     |     |     |     |
|------------------------------|----|--------------------------------------------------------------------------------------------------------------------------------------------------------------------------------------|-----|-----|-----|-----|-----|-----|-----|-----|
| Variables                    | 7  | Clearly define all outcomes, exposures, predictors, potential confounders, and effect modifiers. Give diagnostic criteria, if applicable                                             | no  | No  | yes | Yes | Yes | yes | yes | yes |
| Data sources/<br>measurement | 8* | For each variable of interest, give sources of data and details of methods of assessment (measurement). Describe comparability of assessment methods if there is more than one group | yes | n/a |
| Bias                         | 9  | Describe any efforts to address potential sources of bias                                                                                                                            | no  | No  | yes | Yes | Yes | no  | yes | no  |
| Study size                   | 10 | Explain how the study size was arrived at                                                                                                                                            | yes | Yes |     | Yes | Yes | no  | yes | no  |
| Quantitative<br>variables    | 11 | Explain how quantitative variables were handled in the analyses. If applicable, describe which groupings were chosen and why                                                         | yes | yes | yes | Yes | Yes | no  | yes | yes |
| Statistical methods          | 12 | (a) Describe all statistical methods, including those used to control for confounding                                                                                                | yes | no  |
|                              |    | (b) Describe any methods used to examine subgroups and interactions                                                                                                                  | yes | Yes | yes | Yes | Yes | n/a | yes | yes |
|                              |    | (c) Explain how missing data were addressed                                                                                                                                          | no  | Yes | yes | Yes | Yes | no  | yes | no  |
|                              |    | (d) <i>Cohort study</i> —If applicable, explain how loss to follow-up was addressed                                                                                                  |     |     |     |     |     |     |     |     |
|                              |    | <i>Case-control study</i> —If applicable, explain how matching of cases and controls was addressed                                                                                   |     |     |     |     |     |     |     |     |
|                              |    | <i>Cross-sectional study</i> —If applicable, describe analytical methods taking account of sampling strategy                                                                         | n/a | n/a | n/a | n/a | n/a | n/a | yes | no  |
|                              |    | (e) Describe any sensitivity analyses                                                                                                                                                |     |     |     |     |     |     |     |     |

Continued on next page

**Results**

|                  |     |                                                                                                                                                                                                              |     |     |     |     |     |     |     |     |
|------------------|-----|--------------------------------------------------------------------------------------------------------------------------------------------------------------------------------------------------------------|-----|-----|-----|-----|-----|-----|-----|-----|
| Participants     | 13* | (a) Report numbers of individuals at each stage of study—eg numbers potentially eligible, examined for eligibility, confirmed eligible, included in the study, completing follow-up, and analysed            | yes | Yes | yes | yes | yes | no  | yes | no  |
|                  |     | (b) Give reasons for non-participation at each stage                                                                                                                                                         | no  | no  | no  | yes | yes | no  | yes | no  |
|                  |     | (c) Consider use of a flow diagram                                                                                                                                                                           |     |     |     |     |     |     | yes |     |
| Descriptive data | 14* | (a) Give characteristics of study participants (eg demographic, clinical, social) and information on exposures and potential confounders                                                                     | yes |
|                  |     | (b) Indicate number of participants with missing data for each variable of interest                                                                                                                          | no  | no  | Yes | yes | yes | yes | yes | n/a |
|                  |     | (c) <i>Cohort study</i> —Summarise follow-up time (eg, average and total amount)                                                                                                                             |     |     |     |     |     |     |     |     |
| Outcome data     | 15* | <i>Cohort study</i> —Report numbers of outcome events or summary measures over time                                                                                                                          |     |     |     |     |     |     |     |     |
|                  |     | <i>Case-control study</i> —Report numbers in each exposure category, or summary measures of exposure                                                                                                         |     |     |     |     |     |     |     |     |
|                  |     | <i>Cross-sectional study</i> —Report numbers of outcome events or summary measures                                                                                                                           | yes | yes | yes | yes | yes | n/a | yes | yes |
| Main results     | 16  | (a) Give unadjusted estimates and, if applicable, confounder-adjusted estimates and their precision (eg, 95% confidence interval). Make clear which confounders were adjusted for and why they were included | yes | yes | yes | yes | yes | n/a | yes | yes |
|                  |     | (b) Report category boundaries when continuous variables were categorized                                                                                                                                    | n/a | n/a | n/a | n/a | n/a | no  | yes | no  |

|                                                |    |                                                                                                                                                                            |               |                    |             |             |             |            |             |            |
|------------------------------------------------|----|----------------------------------------------------------------------------------------------------------------------------------------------------------------------------|---------------|--------------------|-------------|-------------|-------------|------------|-------------|------------|
|                                                |    | (c) If relevant, consider translating estimates of relative risk into absolute risk for a meaningful time period                                                           | n/a           | n/a                | n/a         | n/a         | n/a         | n/a        | n/a         | n/a        |
| Other analyses                                 | 17 | Report other analyses done—eg analyses of subgroups and interactions, and sensitivity analyses                                                                             |               |                    |             |             |             |            |             |            |
| <b>Discussion</b>                              |    |                                                                                                                                                                            |               |                    |             |             |             |            |             |            |
| Key results                                    | 18 | Summarise key results with reference to study objectives                                                                                                                   | yes           | yes                | yes         | yes         | yes         | yes        | yes         | yes        |
| Limitations                                    | 19 | Discuss limitations of the study, taking into account sources of potential bias or imprecision. Discuss both direction and magnitude of any potential bias                 | no            | yes                | yes         | yes         | yes         | no         | yes         | yes        |
| Interpretation                                 | 20 | Give a cautious overall interpretation of results considering objectives, limitations, multiplicity of analyses, results from similar studies, and other relevant evidence | no            | yes                | yes         | yes         | no          | yes        | yes         | yes        |
| Generalisability                               | 21 | Discuss the generalisability (external validity) of the study results                                                                                                      | yes           | yes                | yes         | yes         | yes         | no         | yes         | no         |
| <b>Other information</b>                       |    |                                                                                                                                                                            |               |                    |             |             |             |            |             |            |
| Funding                                        | 22 | Give the source of funding and the role of the funders for the present study and, if applicable, for the original study on which the present article is based              | no            | yes                | Yes         | Yes         | Yes         | no         | yes         | no         |
| <b>Overall Quality/Risk of Bias Assessment</b> |    |                                                                                                                                                                            | <b>Medium</b> | <b>Medium-High</b> | <b>High</b> | <b>High</b> | <b>High</b> | <b>Low</b> | <b>High</b> | <b>Low</b> |
