# Supplementary material for: The implementation and effectiveness of the one stop centre model for intimate partner and sexual violence in low- and middle-income countries: a systematic review of barriers and enablers
Source: PubMed Central journal article supplement — BMJ Glob Health. 2020 Mar 30;5(3):e001883. doi: 10.1136/bmjgh-2019-001883 (PMC7170420; doi:10.1136/bmjgh-2019-001883), 2020-03-30
Supplement: bmjgh-2019-001883supp009.pdf [file bmjgh-2019-001883supp009.pdf]

| Review finding         |  |  |  |  |                            |                           |  |                      |  |
|------------------------|--|--|--|--|----------------------------|---------------------------|--|----------------------|--|
| Text of review finding |  |  |  |  | Overall CERQual assessment | Explanation of assessment |  | Contributing studies |  |
|                        |  |  |  |  |                            |                           |  |                      |  |

| CERQual assessment - components |  |           |  |           |  |          |  |  |  |
|---------------------------------|--|-----------|--|-----------|--|----------|--|--|--|
| Methodological limitations      |  | Coherence |  | Relevance |  | Adequacy |  |  |  |
|                                 |  |           |  |           |  |          |  |  |  |
|                                 |  |           |  |           |  |          |  |  |  |

| Characteristics of studies contributing to the review finding |         |        |                      |             |                   |                     |               |            |             |
|---------------------------------------------------------------|---------|--------|----------------------|-------------|-------------------|---------------------|---------------|------------|-------------|
| Author and year                                               | Country | Region | Country income level | Perspective | Type of companion | Population of women | Type of study | Care model | Sample Size |
|                                                               |         |        |                      |             |                   |                     |               |            |             |
|                                                               |         |        |                      |             |                   |                     |               |            |             |

| Methodological assessment of contributing studies |                                                    |                                                           |                                                         |                                                                       |                                                                                     |                                                    |                                              |                                              |                               |                                                  |
|---------------------------------------------------|----------------------------------------------------|-----------------------------------------------------------|---------------------------------------------------------|-----------------------------------------------------------------------|-------------------------------------------------------------------------------------|----------------------------------------------------|----------------------------------------------|----------------------------------------------|-------------------------------|--------------------------------------------------|
| Author and year                                   | Was there a statement of the aims of the research? | Given the aim, was a qualitative methodology appropriate? | Was the research design appropriate to address the aim? | Was the recruitment strategy appropriate to the aims of the research? | Was the relationship between the researcher and participants adequately considered? | Have ethical issues been taken into consideration? | Was the data analysis sufficiently rigorous? | Were the findings supported by the evidence? | How valuable is the research? | Overall assessment of methodological limitations |
|                                                   |                                                    |                                                           |                                                         |                                                                       |                                                                                     |                                                    |                                              |                                              |                               |                                                  |
|                                                   |                                                    |                                                           |                                                         |                                                                       |                                                                                     |                                                    |                                              |                                              |                               |                                                  |

| Adequacy |       |                 |              |  |                       |  |                       |  |  |
|----------|-------|-----------------|--------------|--|-----------------------|--|-----------------------|--|--|
| #        | RefID | Author and date | Author theme |  | Author interpretation |  | Participant quotation |  |  |
|          |       |                 |              |  |                       |  |                       |  |  |
|          |       |                 |              |  |                       |  |                       |  |  |
